# Supplementary material for: Anaesthesia-Induced Transcriptomic Changes in the Context of Renal Ischemia Uncovered by the Use of a Novel Clamping Device
Source: MDPI journal article supplement (doi:10.3390/ijms22189840), 2021-09-11
Supplement: s1 [file s1]

**Table S1.** Sequence of the qPCR primers.

| Primer Name | Primer Sequence       |
|-------------|-----------------------|
| HPRT-s      | CCTCCTCAGACCGCTTTTT   |
| HPRT-as     | AACCTGGTTCATCATCGCTAA |
| GAPDH-s     | AGCTTGTCATCAACGGGAAG  |
| GAPDH-as    | TTTGATGTTAGTGGGGTCTCG |
| GusB-s      | CTCTGGTGGCCTTACCTGAT  |
| GusB-as     | CAGTTGTTGTACCTTCACCTC |
| Ubc-s       | AGCCCAGTGTTACCACCAAG  |
| Ubc-as      | ACCCAAGAACAAGCACAAGG  |
| RPL32-s     | GCTGCCATCTGTTTTACGG   |
| RPL32-as    | TGACTGGTGCCTGATGAACT  |
| KIM1-s      | CCATGGTAGCCAAGGAGAGC  |
| KIM1-as     | GCAAACCCAGAACGCAACTT  |
